# Supplementary material for: Plasmodium vivax inhibits erythroid cell growth through altered phosphorylation of the cytoskeletal protein ezrin
Source: PubMed Central journal article supplement (PMC4392472; doi:10.1186/s12936-015-0648-9), 2015-03-31

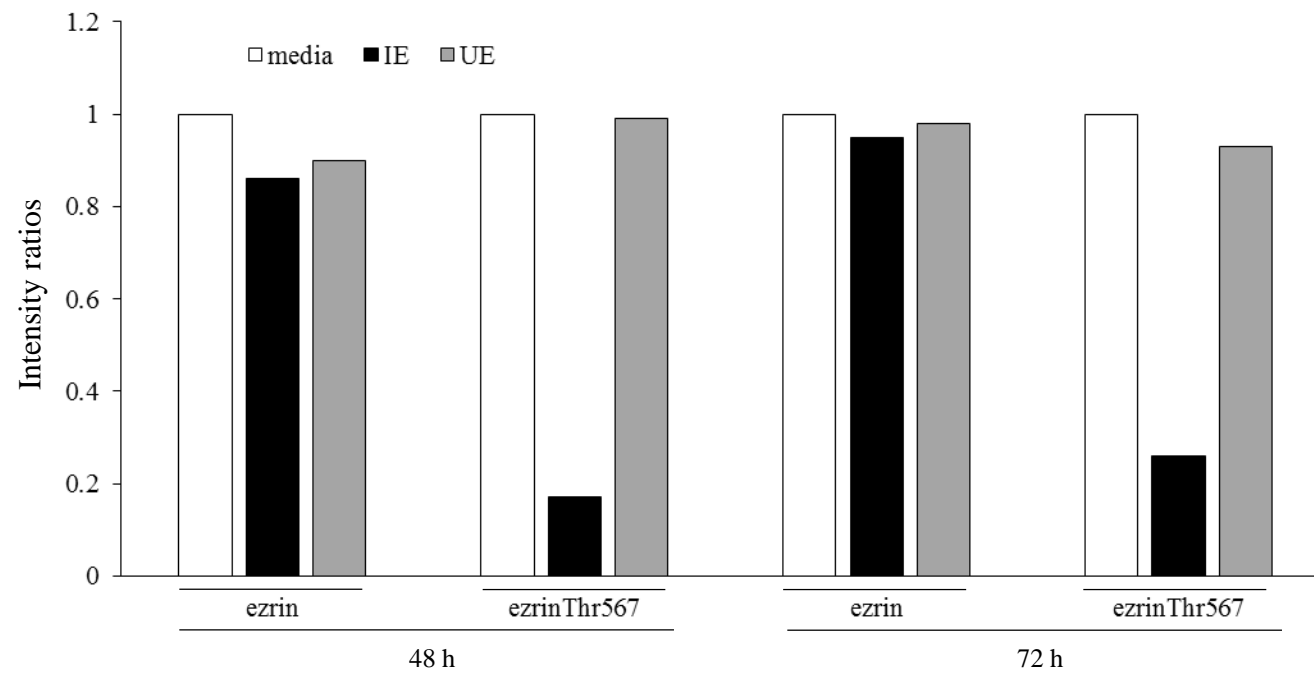

Supplement: 12936_2015_648_MOESM1_ESM.pdf [file 12936_2015_648_MOESM1_ESM.pdf]
