# Supplementary material for: Plasmodium vivax inhibits erythroid cell growth through altered phosphorylation of the cytoskeletal protein ezrin
Source: Springer Nature journal article supplement (doi:10.1186/s12936-015-0648-9), 2015-03-31

Media

IE

UE

24 h

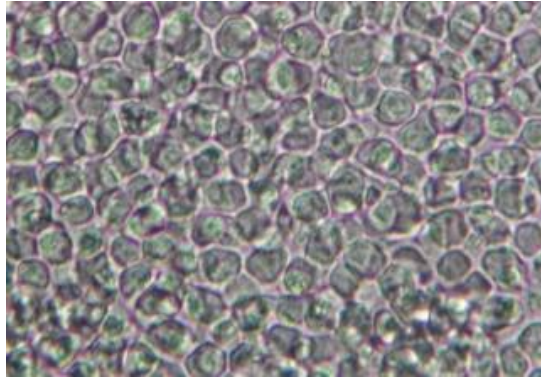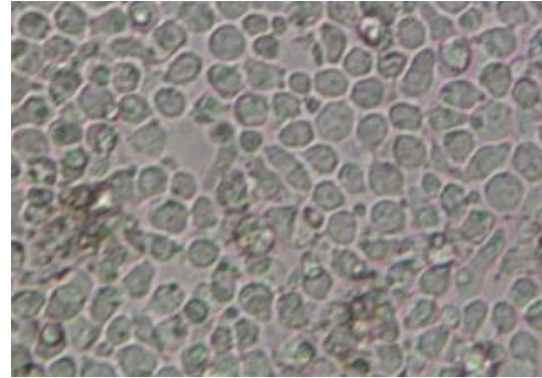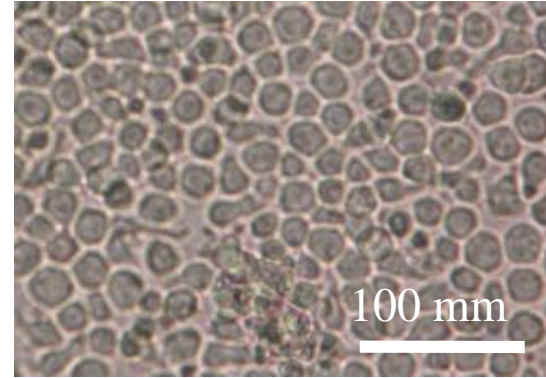

48 h

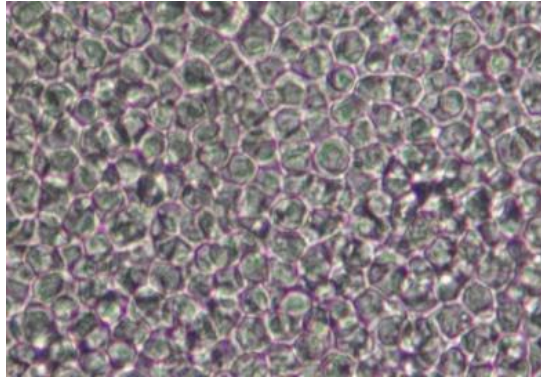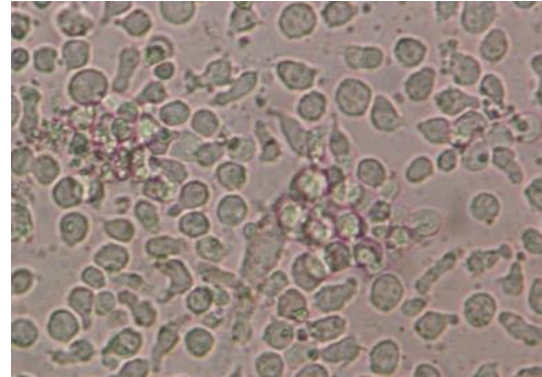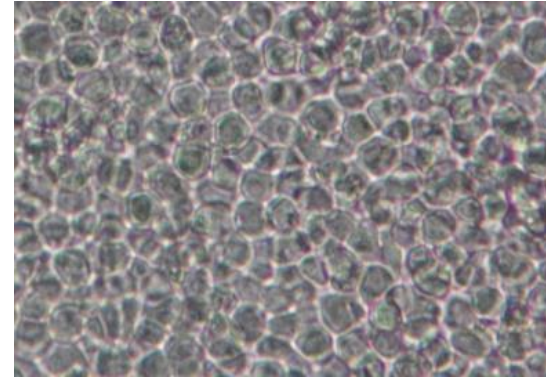

72 h

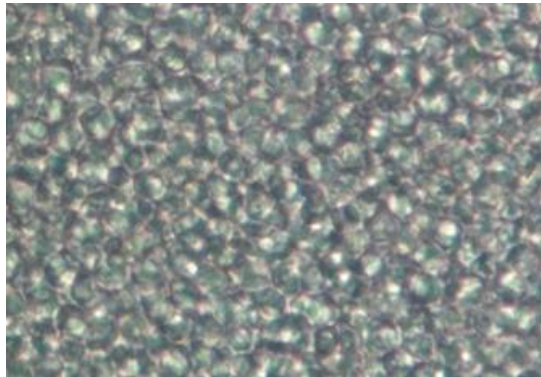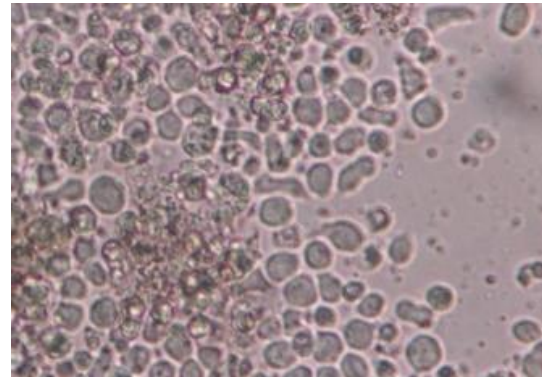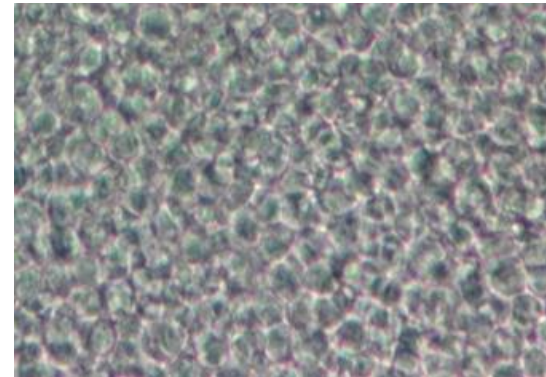

Supplement: MOESM2 [file 9761180]
